# Supplementary material for: Disorganization of Intercalated Discs in Dilated Cardiomyopathy
Source: Research Square preprint supplement (doi:10.21203/rs.3.rs-153597/v1), 2021-02-02
Supplement: Supplementary file 1 [file 7c8ad839f20c4fe5787bb1ae.docx]

**Supplementary Information for**

**Disorganization of Intercalated Discs in Dilated Cardiomyopathy**

Yukinobu Ito, Makoto Yoshida*, Hirotake Masuda, Daichi Maeda, Yukitsugu Kudo-Asabe, Michinobu Umakoshi, Hiroshi Nanjo, Akiteru Goto

***Corresponding author:**

Makoto Yoshida, MD, PhD

E-mail: myoshida@gipc.akita-u.ac.jp

Fig. S1


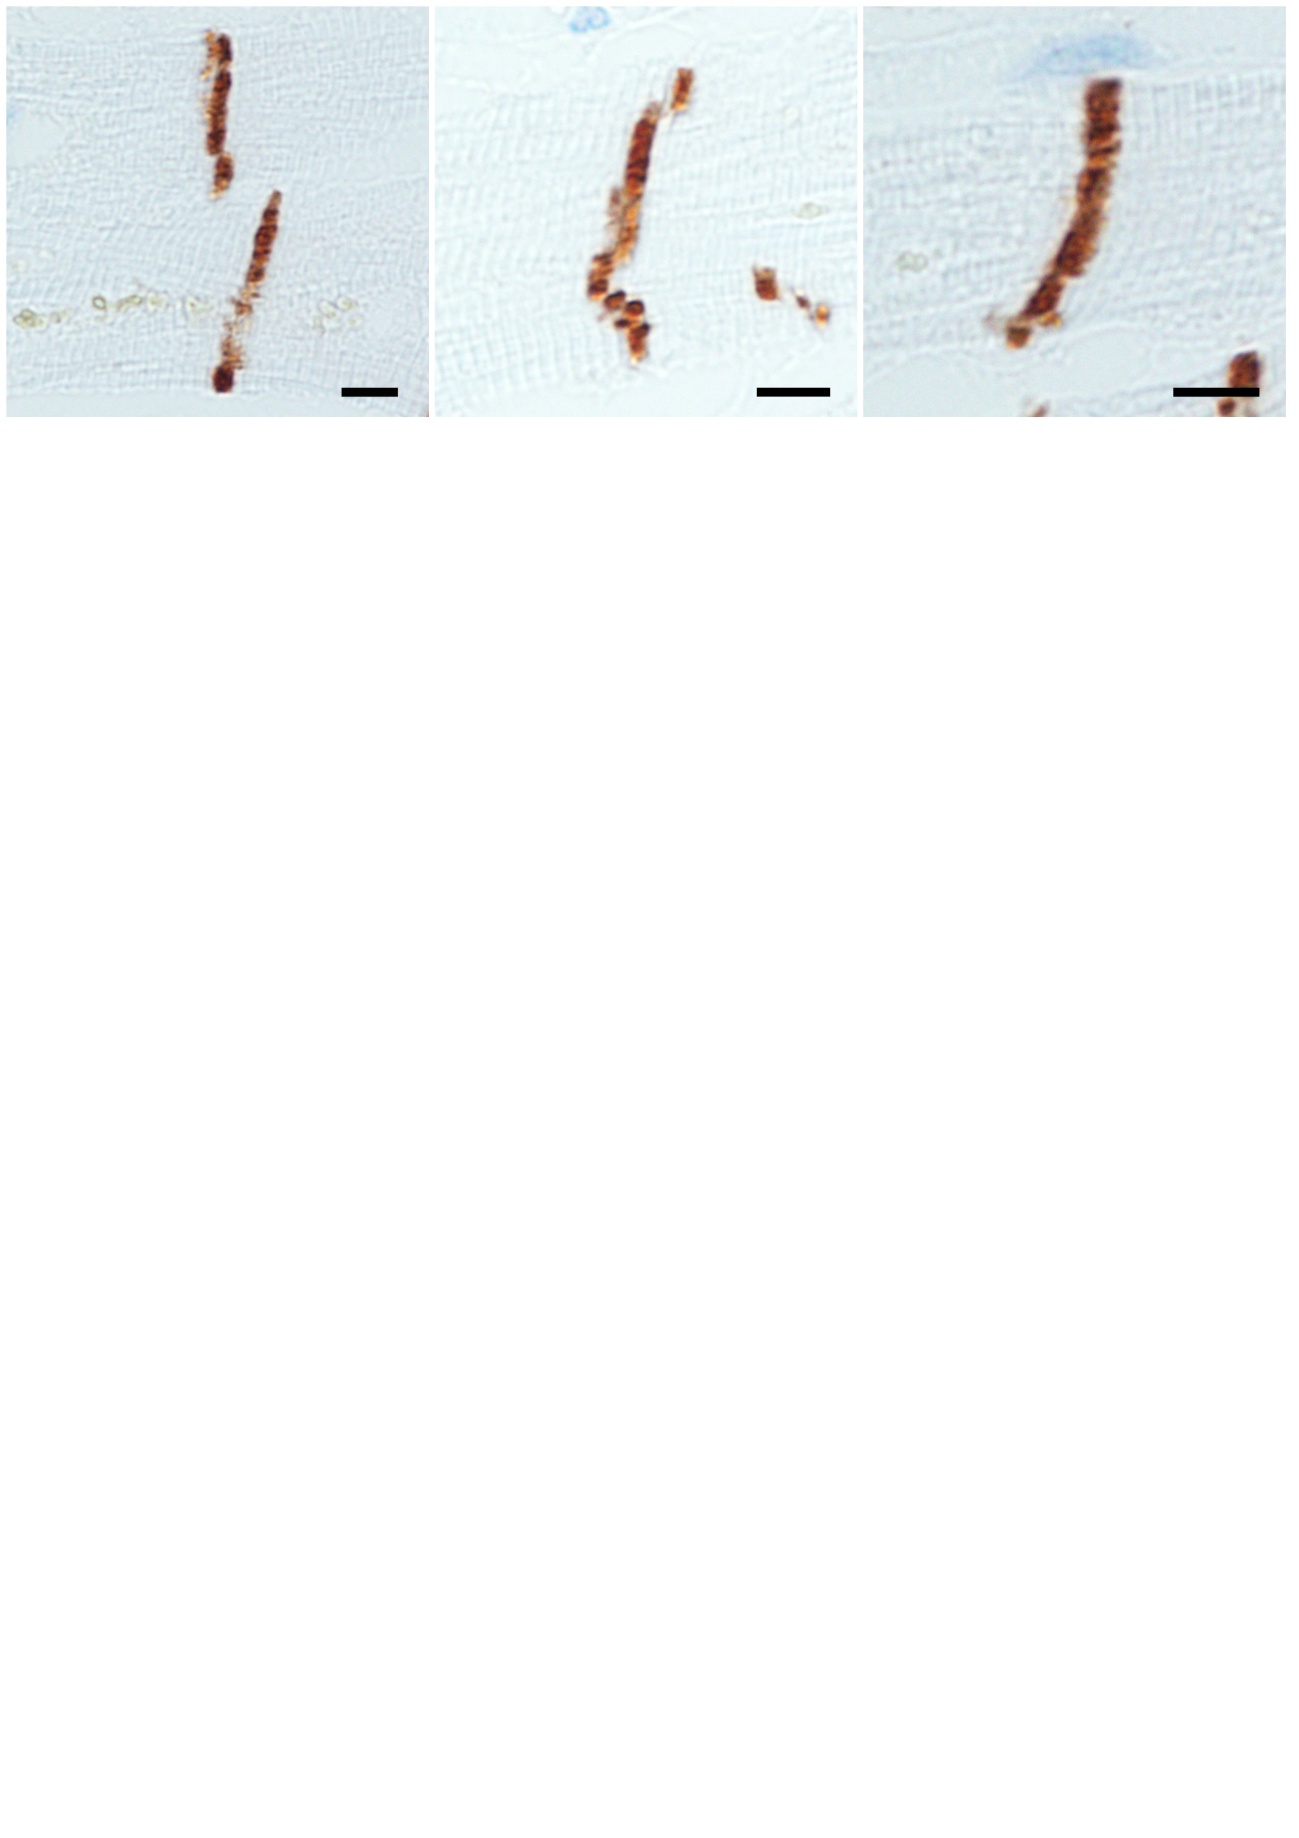


**Fig. S1 Immunohistochemical findings in Hypertrophic cardiomyopathy.**

Immunohistologically, in HCM, we observed no decrease in N-cadherin immunostaining (N-cadherin immunostaining; scale bar, 5 µm; original magnification, ×1000). In addition, ICDs were dyed in a band shape, with no evidence of deterioration or disorganization. Similar findings were obtained in the control and CHF groups.

Fig. S2


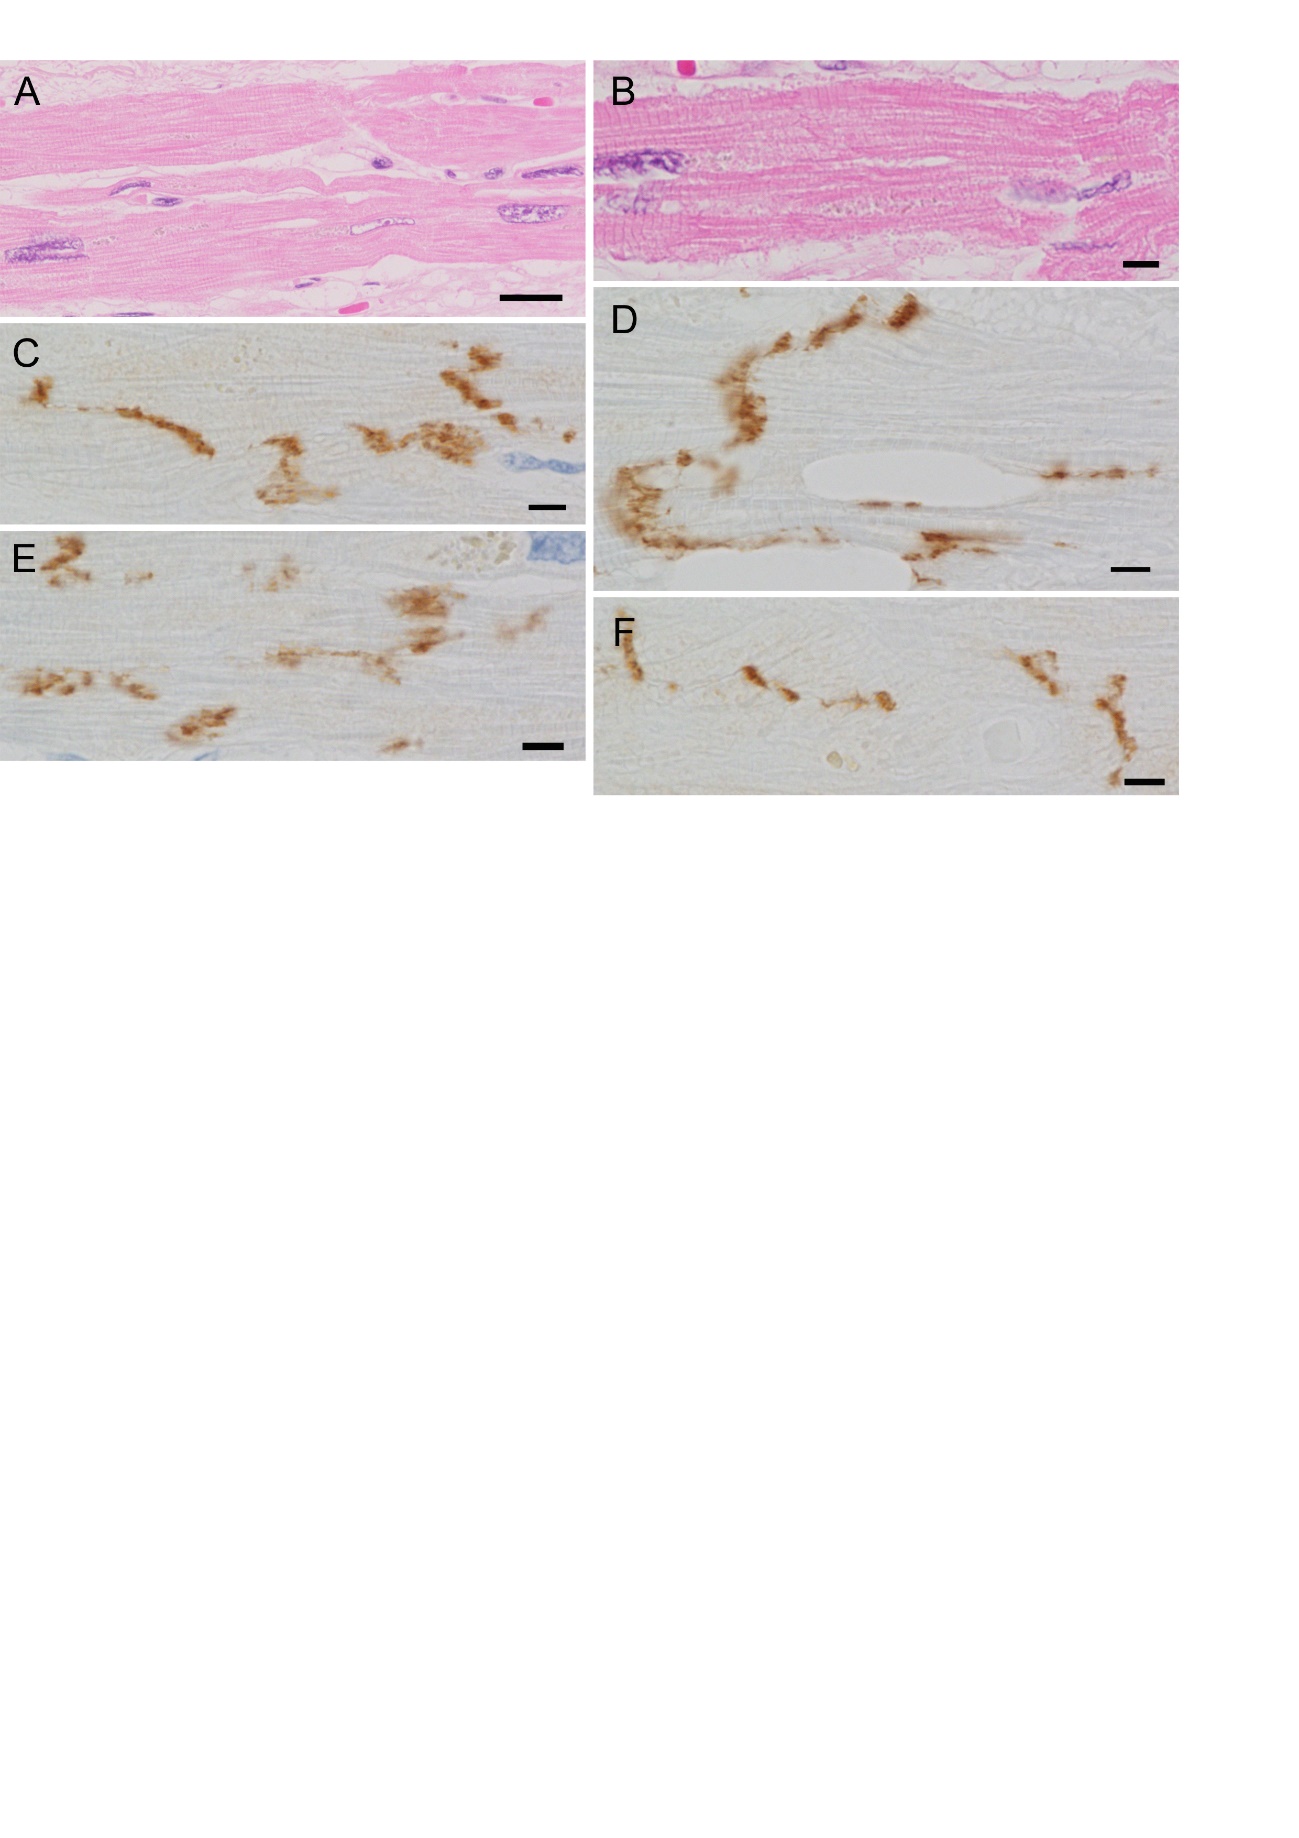


**Fig. S2 A case diagnosed as DCM was considered to be CHF based on the results of N-cadherin immunostaining and ICD scattering.**

This case was clinically diagnosed as DCM, and an autopsy was performed. Histologically, characteristic findings such as cardiomyocyte atrophy, nuclear pleomorphism, and interstitial fibrosis were not observed (A: H-E staining; scale bar, 20 µm; original magnification, ×400). ICDs were visible (B: H-E staining; scale bar, 10 µm; original magnification, ×1000).

Immunohistochemistry revealed that N-cadherin immunostaining was not reduced in ICDs, and the ICDs had a band-like appearance (C–F: N-cadherin immunostaining; scale bar, 5 µm; original magnification, ×1000). ICD scattering was not observed. Based on these findings, we classified this case as CHF. Because this patient was receiving adriamycin, we suspected adriamycin cardiomyopathy.

Fig. S3


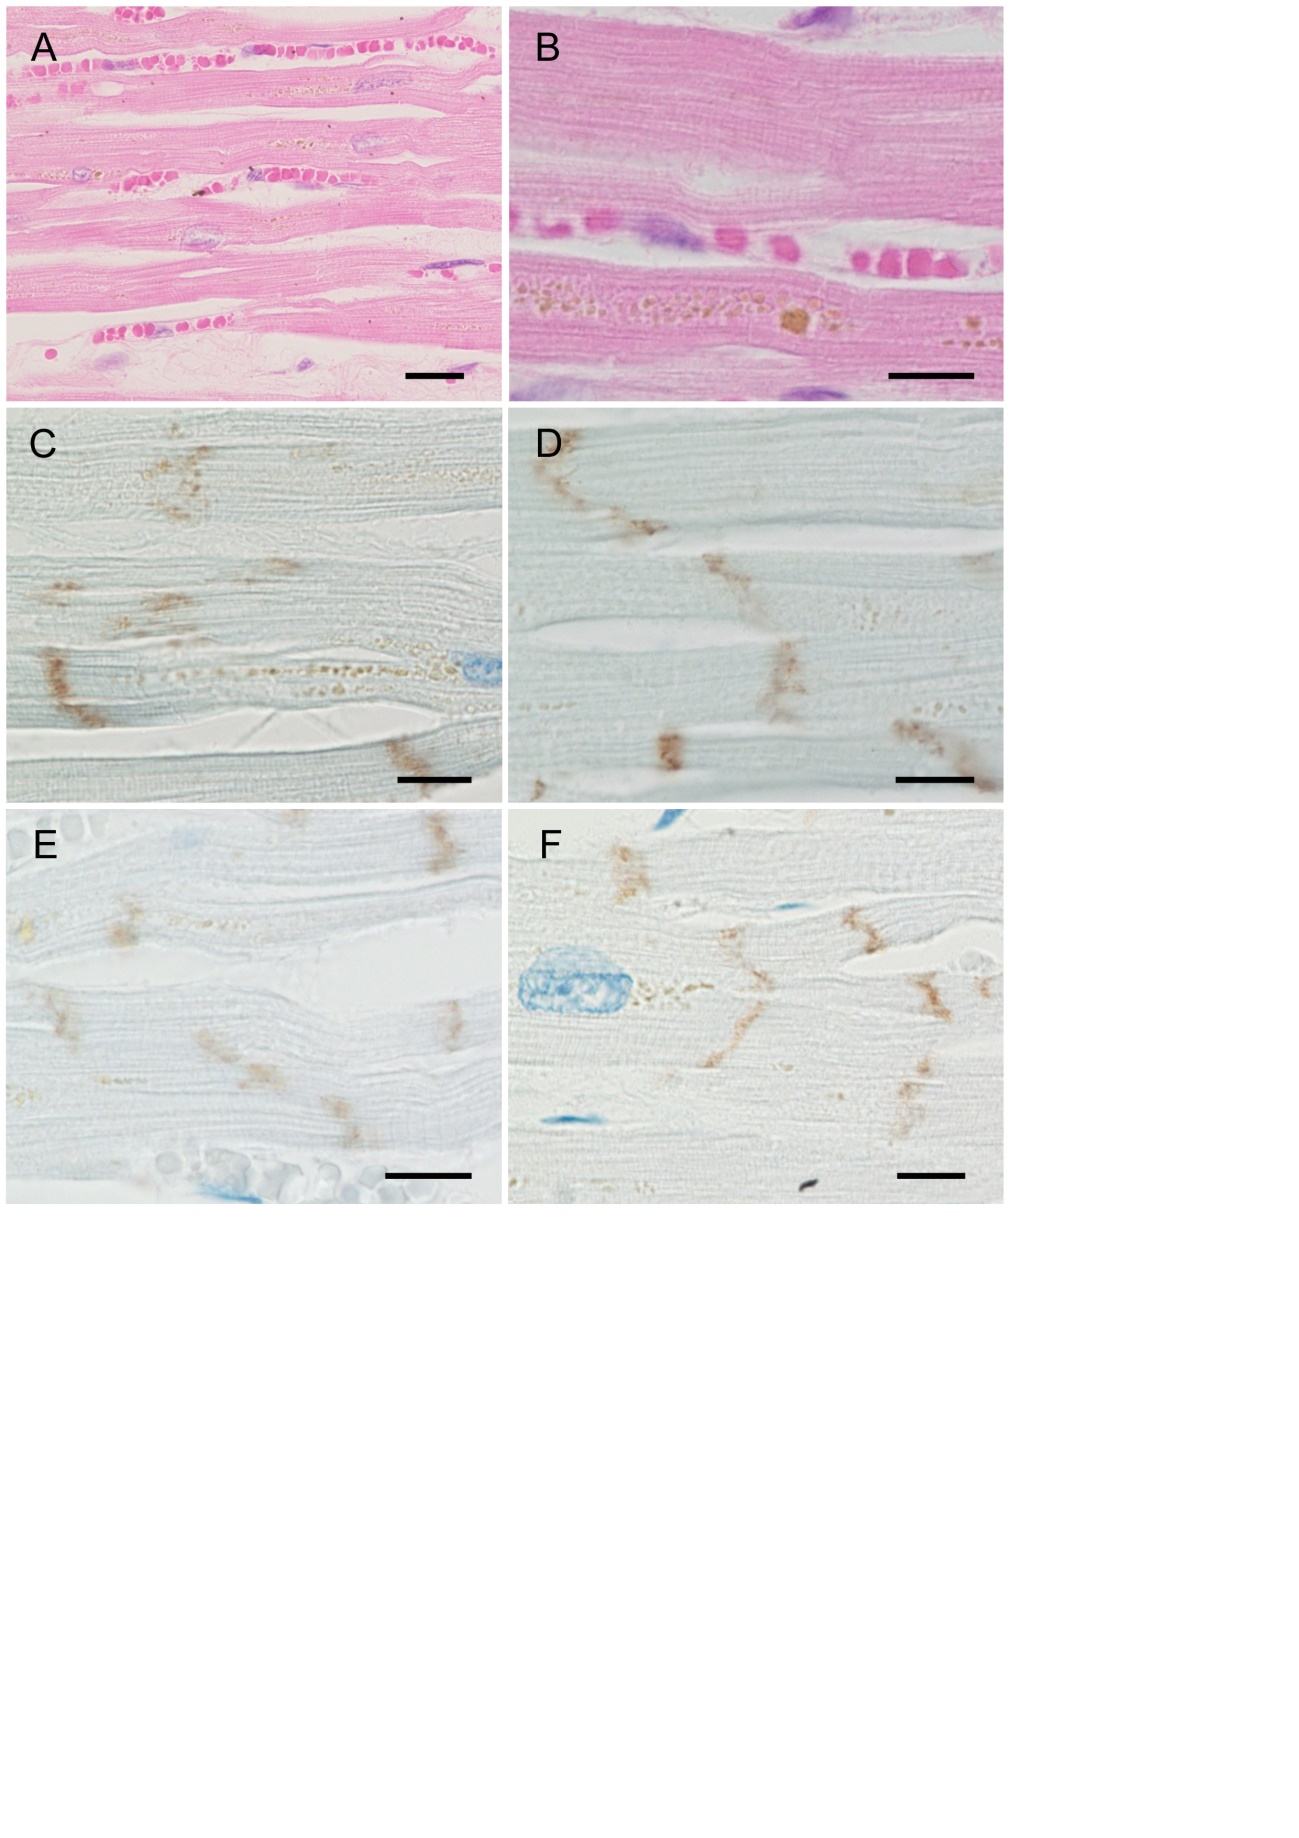


**Fig. S3 A case diagnosed as CHF was considered to be DCM based the results of N-cadherin immunostaining and ICD scattering**

This case was clinically diagnosed as CHF, and an autopsy was performed. Histologically, cardiomyocyte atrophy, nuclear pleomorphism, and interstitial fibrosis were observed (A: H-E staining; scale bar, 20 µm; original magnification, ×400). ICDs were not clearly visible (B: H-E staining; scale bar, 10 µm; original magnification, ×1000).

In immunohistochemistry, N-cadherin immunostaining was reduced in many ICDs, and ICD disintegration was observed (C–F: N-cadherin immunostaining; scale bar, 5 µm; original magnification, ×1000). ICD scattering was apparent. Based on these findings, we have classified this case as DCM.
